# Supplementary material for: Application of a synthetic zeolite as a storage medium in SBRs to achieve the stable partial nitrification of ammonium
Source: Royal Society of Chemistry journal article supplement (doi:10.1039/c8ew00641e), 2018-12-06
Supplement: c8ew00641e1.pdf [file c8ew00641e1.pdf]

**Supplementary information (SI) of manuscript**

**Application of synthetic zeolite as a storage medium in SBR to  
achieve stable partial nitrification of ammonium**

Jing Chen<sup>a,b</sup>, Xiaojun Wang<sup>a,b</sup>, Xinghui Feng<sup>a,b</sup>, Zhenguo Chen<sup>a,b</sup>, Xiaokun Chen<sup>a,b</sup>

a. School of Environment and Energy, South China University of Technology, Guangzhou,

510006, China;

b. The Key Lab of Pollution Control and Ecosystem Restoration in Industry Clusters, Ministry of

Education, China;

Corresponding author: cexjwang@scut.edu.cn

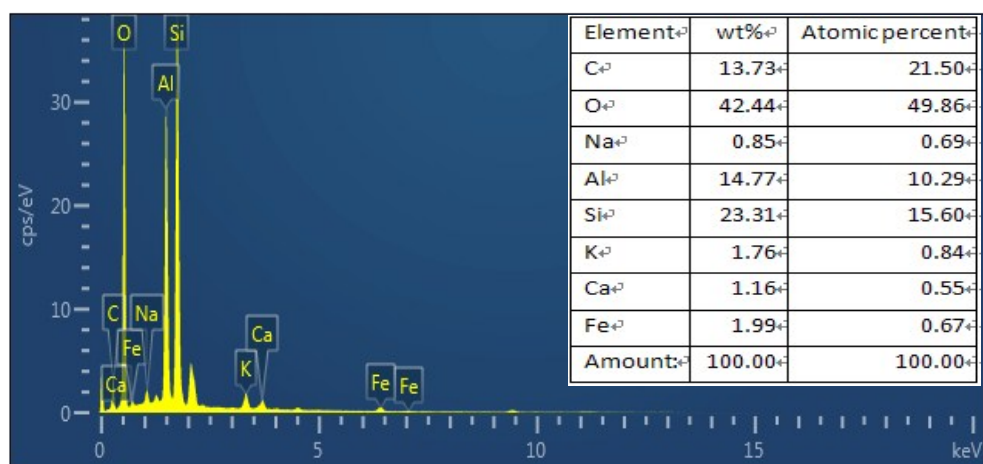

**Fig. S1.** Energy Dispersive Spectrometer graphs of Coal fly ash

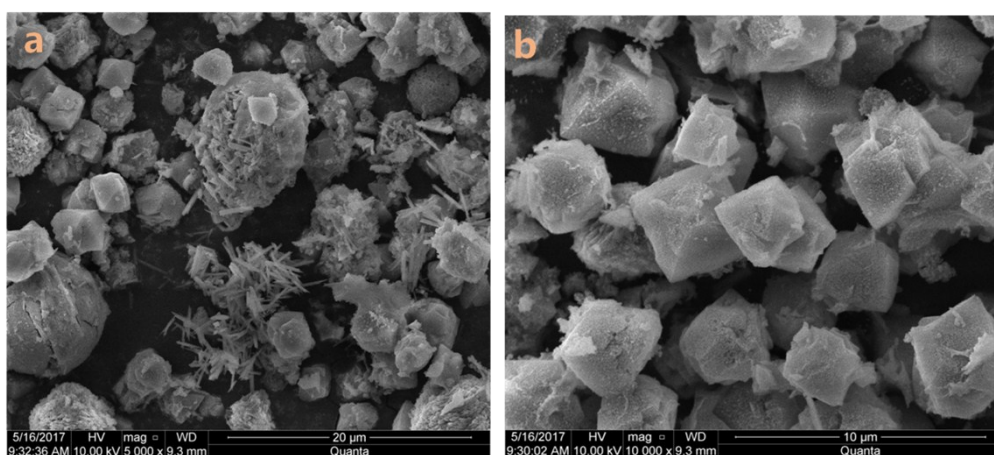

**Fig.S2.** SEM micrographs (a-b) of ZCFA

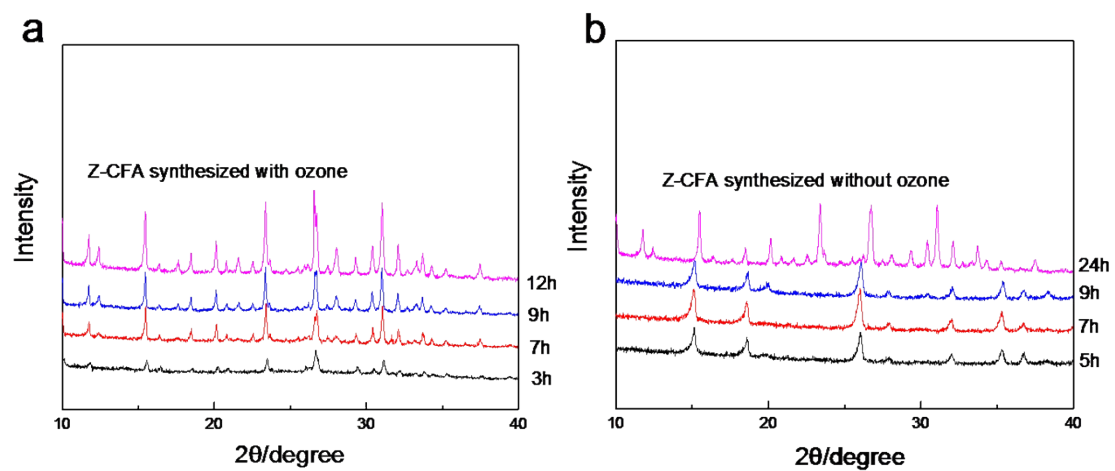

**Fig.S3.** XRD patterns of (a) ZCFA bubbled with ozone; and (b) ZCFA bubbled without ozone.
